# Supplementary material for: Oceanic gateways in Antarctica – Impact of relative sea-level change on sub-shelf melt
Source: Copernicus journal article supplement (doi:10.5194/egusphere-2023-2737), 2023-11-21
Supplement: Supplementary file [file egusphere-2023-2737-AC2-supplement.pdf]

# Response to Reviewers

Kreuzer, M., Albrecht, T., Nicola, L., Reese, R., and Winkelmann, R.: Oceanic gateways in Antarctica – Impact of relative sea-level change on sub-shelf melt, EGU sphere [preprint], <https://doi.org/10.5194/egusphere-2023-2737>, 2023.

We thank all three reviewers for taking substantial time and effort to read and comment on our manuscript. The given comments are of constructive nature and very valuable to considerably improve the manuscript.

In order to reduce duplicated comments we grouped and summarized the general comments of all three reviewers and will respond to them in the section below. Furthermore, we respond to all specific comments individually (see further below).

All our comments are displayed in blue color, while the reviewers comments (directly copied or paraphrased) are displayed in black. Original text from the preprint is shown in *black and italics*.

## General comments

- Scientific value and goal of study (RC1, RC2, RC3)
  - “The scientific value is difficult to assess, due to: the methodology limits; the application only to the actual grounding line configuration; and a lack of development perspective in the application of the method to more realistic studies.” (RC1)
  - “It is not very clear what the study wants to achieve, since the ‘g’ parameter remains free and the grounding line is kept at the present-day position. If the purpose is to produce a conceptual model I suggest strengthening the methodology to take into account a more accurate present-day oceanographic setting, which is also a key input for PICO.” (RC1)

The goal of our manuscript is to estimate the maximum impact that relative sea level (RSL) change can possibly have on sub-shelf melting of the Antarctic Ice Sheet. So far, this relation has not been assessed or considered in ice-ocean modeling and we want to provide a first estimate on the importance of this mechanism. In our study we are not trying to pin-down exact basal melt rate differences at specific time slices. Instead, the LGM15ka and Icefree scenarios are enclosing the maximum range of expected RSL changes on time scales of glacial cycles, which are of interest to the ice-sheet modeling community. By estimating basal melt rate changes for these end-member configurations on a present-day ice-sheet state, we inferred a sensitivity measure providing upper and lower bounds of this process. However, in more realistic scenarios, when other important features are subject to change (like the grounding line position or the far-field climate forcing), the overall effect of RSL change on melt rates might be reduced. Further below, we will comment more on the reasoning to use a present-day ice-sheet configuration.

We have realized that the current manuscript does not convey this message clearly enough and

apologize for any consequential misunderstandings. Speaking of different “RSL scenarios” for example does not reflect the methodological concept very well and we will therefore change this to “RSL configurations” in the revised manuscript. Furthermore, we strive to adapt the overall framing of the paper and be more clear about the motivation and scope of the study. We are also considering to change the title of the manuscript accordingly.

Concerning the “free evolving parameter  $g$ ”: Initially we have used critical access depths for a value of  $g=50\%$  in order to ensure that a “significant” amount of the grounding line is reached by topography controlled inflowing open ocean water masses. However, it is difficult to define a universal percentage of the grounding line that needs to be accessed by inflowing water in order to dominate the overall melting. Therefore, we decided to expand the analysis for the wider range of grounding line coverage from 10-90% and check for the dependency of our results with respect to the percentage of grounding line reached. We believe that this can be useful in order to evaluate the maximum possible effect of RSL change on basal melt rates. However, we agree with the reviewers that this part of the methodology needs more consideration, when trying to determine definite basal melt changes for a specific scenario, rather than merely estimating the maximum possible effect. In the scope of current revisions for Nicola et al. (in review), we also explore possibilities to reduce the  $g$ -dimension into an appropriate single value per basin, which will possibly result in an update of the methodology of our paper as well.

- Meaning of Icefree scenario (RC1, RC2, RC3)
  - Basal melt change in icefree scenario is meaningless without ice (RC1, RC2, RC3)
  - useful as a maximum estimate (RC1)
  - Need to specify the usefulness of this scenario for future science (RC3)

The idea of integrating an icefree configuration for RSL was to yield an upper bound for the far-field sea-level rise on the one hand, and superimpose a strong near-field GIA uplift signal on the other hand. At first sight it may seem odd to calculate basal melt rate changes for such a RSL configuration, where the Antarctic Ice Sheet has been melted completely. In fact, this RSL (and bed topography) configuration could be the initial condition for a glaciation of an Antarctic Ice Sheet, where basal melt rates should account for different access depths.

As pointed out above, the intention of using end-member RSL configurations in our analysis is to enclose the maximum realistic change that can be expected on paleo time scales. In order to isolate the effect of RSL change from other mechanisms on basal melt rates, it is necessary to compare to a common baseline. This is why we apply the different RSL configurations to a present-day ice sheet and keep all other processes fixed that are subject to change on these time scales, like grounding line position, cavity geometry, ocean forcing conditions, etc. With this method we are able to derive an upper bound estimate of the RSL change influence on basal melt. For more realistic estimates that correspond to specific time slices, a matching ice-sheet geometry should be consistent with the applied RSL configuration. We comment more about this in the paragraph below.

- Proposal for transient simulations with evolving grounding line configuration (RC1, RC2, RC3)
  - more realistic application like grounding line configuration/position (RC1)
  - More value, if running a transient simulation (deglaciation or extended SSP) with/without relative sea level feedback (RC2)
  - An assessment on the evolution of the importance of certain gateways for the deglacial AIS retreat would make the study of greater scientific value (RC1)
  - Missing perspective for further application (RC1, RC2, RC3)
    - lack of development perspective in the application of the method to more realistic studies (RC1)
    - How applicable is this method for transient ice sheet simulations? (RC2)
    - Required: transient simulations with dynamic adjustment of critical access depths and according modification of ocean temperatures (RC3)

We agree that it would be very valuable to assess the impact of RSL change on basal melt rates for transient evolving grounding lines. This would help to get a more realistic estimate on the importance of the mechanism, which is possibly smaller than the maximum estimate that we assess for the end-member configurations in our study.

For paleo simulations, ice sheet models often use an index method, where ocean temperatures are scaled with a paleo proxy, like  $\delta O_{18}$  or temperature reconstructions from ice cores (e.g. Albrecht et al., 2020). In case of RSL basal melt corrections for transient runs, this temperature correction needs to be combined with the approach for computing RSL induced effects on basal melt rates used in this study.

When preparing the revised manuscript, we are planning to do this for multiple time slices for a transient deglaciation run from LGM to present-day. While doing so, we can then assess what the RSL induced impact is on basal melt rates, not only for a present-day ice sheet configuration, but also for evolving grounding line geometries. With the offline computed RSL correction, we can then also re-run a deglaciation scenario for the LGM configuration and see whether the transient ice sheet response diverges from the run without including RSL induced corrections.

## Introduction

- “There is a lack of description of the oceanographic setting and gateways at present, which is a key point of the paper and would inform the reader on how far the method would be applicable to present and past scenarios.” (RC1)

So far, we have not included a thorough discussion of present-day gateways and the corresponding ocean conditions as this is covered in depth in the Nicola et al. (in review) paper. We agree that it would help the reader to judge the applicability and limitations of our methodology if more information/discussion about the different modes of melting is included in the manuscript. At the same time, we want to minimize overlap with the related study of Nicola et al. (in review). We will consider this comment when preparing a revised manuscript.

- Missing: effect of GIA on ocean dynamics (RC3)

Giving more information and context about the effect of GIA on ocean dynamics is a very good suggestion and adds valuable context to the study. We thank the reviewer for pointing this out and will include studies like Rugestein et al. (2014) or Lowrey et al. (2024) in a revised version of the manuscript.

- transform Figure 1 into a conceptual figure to reduce complexity while illustrating the bathymetric elevation changes and their effect on access depths (RC2)

Thanks for this suggestion. We agree that a conceptual figure with reduced complexity would be more suitable to convey the basic concept and methodology of our study. We will endeavor our creative skills and try to improve Figure 1.

## Methods

- Keeping grounding line at present-day location is inconsistent with applied scenarios and therefore lacks scientific significance (RC1, RC2, RC3)

As explained above, we think that it is useful to apply different RSL configurations and their derived changes in thermal forcing on a present-day ice-sheet configuration to roughly quantify the maximum possible effect on basal melt rates in first order. In order to attribute changes to the effect of RSL only, it is important that other conditions that influence basal melt rates do not change within the comparison. In such a sensitivity experiment, it would therefore not be useful to compare basal melt rates derived for a present-day ice-sheet configuration with ones from an LGM state that includes not only RSL induced changes, but also features a different grounding line position, cavity geometry and ocean forcing. In such a case it would be unclear which changes can be attributed to the different ice sheet state and corresponding climate forcing, and which ones are due to changes in RSL.

Instead, one would need to compare basal melt rates for an LGM scenario with and without the effect of RSL. This requires a meaningful correction of the 3-dimensional ocean forcing field (ISMIP6 dataset by Jourdain et al., 2020) we use for present-day to LGM conditions. For the icefree case this comparison is not possible as we obviously cannot compute basal melting for a non-existing ice sheet. When preparing a revised version of the manuscript, we will explore possibilities to use a LGM ice-sheet state to directly compare basal melt rates with/without the influence of RSL.

- Critical access depth definition is not fully understandable/defined including grounding line coverage parameter  $g$  (RC1, RC2)

We apologize that the description and explanation of “critical access depth” and the grounding line coverage parameter  $g$  was apparently not clear enough in the manuscript. We will revise the manuscript and provide a more detailed explanation.

- Inconsistencies of input T,S between this study and Nicola et al.: Continental Shelf Break vs Calving Front (RC1)

In our study we use the same methodology as Nicola et al. (in review) to compute critical access depths. As the reviewer correctly points out, the further methodology diverges partially. The

preprint of Nicola et al. for example uses the temperatures at the continental shelf break (CSB) and calving front (CF) directly as input to PICO. In our study we apply an anomaly approach instead, where we compute the difference of CSB temperatures at different depths and add this to present-day ocean forcing derived in Reese et al. (2023). The mentioned discrepancies of input temperatures are resulting from different scientific questions in the two manuscripts and are not inherently inconsistent.

In the context of revisions for Nicola et al. we are currently discussing changes to their approach. Nevertheless, we will make sure that in a revised manuscript, we state more clearly where the methodology of Nicola et al. and our study is the same, and where it diverges. We thank the reviewer for pointing this out and apologize that missing information about this led to misunderstandings.

- Adding CSB anomalies to CF/PICO input values is not appropriate especially for shelves that are not “warm” after Thompson et al. (2018) (RC1):  
“PICO would need to be forced by realistic water masses at the calving front, and employing shelf break temperature and salinity, even only as anomalies with respect to the present day, is not representative of the water masses entering the cavities. The only case may be for “warm” type continental shelves (Thompson et al., 2018), where the CDW is actively pushed towards the ice shelf cavities by winds and by dynamical processes in the Along-Slope Front such as an Eastward flowing undercurrent (Silvano et al., 2022). The method could work in specific locations on “fresh” shelves (Thompson et al., 2018), after applying some corrections to take into account mixing of CDW into “modified” CDW (mCDW), which also tilts the isopycnals on the shelf break (may think of extrapolation along isopycnals). As for melting in multimodal cavities (e.g., Tinto et al., 2019), melt by mCDW usually occurs at mid-depth, while the grounding line mostly melts with mode cold salty water (Mode 1, Silvano et al., 2016; Herraiz-Borreguero 2015). These features are not accounted for, and the methodology misrepresents the impact of mCDW in these cases, since there is no direct connection between the mCDW and the grounding line. Also see e.g. Herraiz-Borreguero (2015), usually only the Eastern side in multimodal cavities is affected by mCDW, while here the anomalies are applied to the whole basin. Therefore the method, although simplified, would be fully applicable to “warm” continental shelves found mostly in West Antarctica.”

Thanks for the elaborated comment about the applicability of the methodology. We are aware of the fact that applying continental shelf break anomalies directly inside the cavities is a broad assumption and might overestimate the effect of water mass changes.

As described in Thompson et al. (2018) shelf modes are also controlled by topographic barriers (not exclusively though). Therefore, changes in RSL can also affect the dominant mode of melting in the cavity and how much warm CDW can make it onto the continental shelf. While we don't account directly for such a change in modes, we assume that the CSB anomalies are the maximum possible changes that can be reflected inside the cavity. Therefore, the approach is suitable when trying to assess the maximum possible range of change.

Reese et al. (2018) show that PICO can produce realistic circum-Antarctic mean melt rates, independent of shelf mode after Thompson et al. (2018). The PICO parameters and present-day input temperatures are re-tuned in Reese et al. (2023) to match melt rate sensitivities and

historic ice loss.

- Thicker layer of CDW intrusion will have an impact, even if  $d_c$  is below thermocline (RC1)

Indeed this is a clear limitation of our methodology. We thank the reviewer for raising this point and make sure that this is adequately discussed in a revised version of the manuscript.

- Explain the simplifications of the used methodology (e.g. compared to using dynamic ocean modeling to assess changes ocean temperatures) and evaluate its validity (RC3)
- Lack of evaluation of the validity of the use of a simplified method to study the effect of relative sea level on ocean temperatures instead of using an ocean model (RC3)

Unfortunately we don't have the means to test and validate the findings of our simplified methodology with high resolution ocean modeling. However, we would be really interested whether our results can be confirmed also with other methods. In a revised manuscript, we will add the need for validation of our findings with high-resolution ocean models.

- "Ocean access does not solely work via the deepest gateways but arguably most of the warm water e.g. in the Amundsen Sea is channeled via these gateways, does your approach also reflect the change in basal shelf melt rates at the grounding line for the bulk advection of CDW/mCDW etc. across the continental shelf and into the cavity?" (RC2)

The water channeled through the deepest connection between the continental shelf and the open ocean (oceanic gateway) is represented via the lowest grounding line coverage. In our methodology this is represented by reaching at least the deepest 10% of the grounding line. As shown by the magenta boxes in Fig. 3 in Nicola et al. (in review) the deepest connection can reach vast amounts of the grounding line in case of a "oceanic gateway"/trough, e.g. up to 75% in the Filchner-Ronne basin.

However, of course also shallower connections exist (e.g. above the magenta boxes in Fig. 3, Nicola et al., in review). At these depths, most of a region's grounding line can be accessed by water from the open ocean/continental shelf and thus represented by higher grounding line coverage.

## Discussion

- Missing: applicability only to "warm" and maybe "fresh", not "dense" shelves -> PICO limitations (RC1)

Please see our comment about PICO above.

- How would this approach be applicable in time-evolving ice sheet simulations? What are caveats and limitations, e.g. changing ocean forcing over time? (RC2)

Please also see our general comment about transient ice-sheet simulations including RSL induced corrections above.

A big limitation is the availability of time evolving 3-dimensional ocean temperature and salinity forcing in sufficient spatial resolution. For paleo simulations, ice-sheet models often use an index method, where present-day observations of ocean temperatures are scaled with a paleo proxy, like  $\delta O_{18}$  or temperature reconstructions from ice cores (e.g. Albrecht et al., 2020). This can for example be 2-dimensional (spatially) resolved observations on the continental shelf, which serves as input to PICO. However, when accounting for RSL induced changes over time, we need spatial 3-dimensional (depth dependent) ocean data to derive vertical RSL corrections at the continental-shelf break. Thereby the question arises whether the climate index method has a depth dependency or can be used uniformly as a scalar offset to the whole column. For the latter case, we can use present-day ocean data like from Jourdain et al. (2020) and scale it similarly to the PICO input in Albrecht et al. (2020).

If we will use such corrections in an example of a transient simulation in the revised manuscript, we will discuss the caveats and limitations of this approach.

- More assessment of importance of RSL effect on melt-rates, e.g. vs changing ocean forcing (first or second order effect)? (RC2)

In our study we discuss that the maximum effect of end-member RSL configurations can have an effect on the thermal driving in the same order of magnitude as changes in ocean forcing on paleo time scales. Nevertheless, it could well be that the RSL influence is still a second order effect, in case the actual influence of climate induced changes is stronger than the modulation through RSL. For example in an LGM state, when the overall climate forcing produces little to no basal melt compared to present-day, the RSL effect would be negligible and non effective. However, it can become important during the deglaciation period and affect the timing and evolution of the ice mass. As laid out above, we strive to extend our experiment setup in order to make some quantitative statements about this in a revised manuscript.

- Missing sensitivity of Earth rheology parameters on result (RC3)

The 3D Earth rheology used shows a high sensitivity to glacial cycles load changes at the upper end of tested 3D and 1D rheologies (Albrecht et al., 2023, in review). This fits our "maximum sensitivity range analysis" approach. We will add a discussion about the effect of different Earth rheology parameters in the revised manuscript and thank the reviewer for pointing this out.

- How computationally costly is the method? (RC2, RC3)

We will include information about the computational cost of the flood-fill in a revised manuscript. We thank the reviewers for pointing out that this information is missing and agree that it can be of interest to the reader.

## Specific comments of Reviewer 2 (Johannes Sutter)

L46 during the LGM

Thanks for the comment. We have corrected the phrasing.

L58 «Antarctica loses up to 3.13 m of sea-level equivalent ice» 3.12 m is a very precise upper estimate and I think it is alright to write ca. 3.1 m here given the substantial uncertainties associated with these projections.

Thanks for the comment. We agree that 3.1m is sufficiently precise for the context here and have corrected the manuscript.

L68 I suggest to rephrase to something like “has to be designed/parameterized/prescribed in a robust manner”. “... appropriate way” is quite subjective given the scarce proxy-constraints for paleo climate states and evolution.

Thanks for the good suggestion. We have adapted the phrasing accordingly.

L77 “As (positive) values of RSL indicate ... ”

I assume changes in RSL can go both ways (positive and negative), therefore same for bedrock topg. Or do you refer to only positive anomalies?

Relative Sea Level (RSL) comprises changes in water column thickness. We interpret a change in RSL as negative topography change (both uplift and subsidence), while the ocean surface elevation aligns with the geoid ( $z=0$ ). We have chosen to add “(positive values of)” in brackets in the manuscript, as negative RSL values technically don’t represent a water column depth, but rather the land elevation above sea level.

L86 do you refer with “flow pattern” to ice flow or ocean circulation changes? I assume ice shelf flow?

We are referring to changes in local ocean circulation here, which we assume to be unaffected by bed topography changes and simply remain constant (depth layers) relative to the surface. We have adapted the manuscript to clarify this.

L86-88 if I follow your argument correctly this is assuming that ocean circulation does not change right? A real scenario with 100 m RSL changes would, I presume, be associated with ocean circulation changes as well. Not so straightforward to disentangle the actual effect in a coupled system, but I’m aware that this is not what you are discussing here. However I’d suggest to include this caveat somewhere in the discussion.

Correct. We are assuming that the ocean circulation does not change. We will cover the missing effect of ocean circulation changes through RSL in our methodology by including it in the paragraph about *present-day ocean observations* in the discussion.



L109 “a configuration with all continental ice masses transformed into liquid water (GMSL  $\approx$  +70 m).” repeating myself here, but what relevance has such a scenario? If all ice is gone, the concept of basal melt rates is rather meaningless? Except for glaciation scenarios after such a complete de-glaciation. However, it would be anyone’s guess how ocean conditions would look like in such a scenario. I am a little unsure how informative this high-end member is.

Thanks for raising this point. As explained above, the idea here is to evaluate basal melt sensitivity for a maximum range of RSL changes induced by ice-mass changes. We have realized that speaking of an icefree “scenario” is actually not really appropriate here, as the RSL configuration is rather a theoretical upper limit that we want to test (see also our general comment above). If a new ice sheet would form for such a bed topography it may be subjected to similar boundary conditions.

Section 2.2. is this the algorithm developed by X. Davis for ISMIP6? If so, please reference. Nevermind, just saw in Nicola that this is similar to ISMIP6.

Yes, the method is comparable to the extrapolation of ocean properties (temperature, salinity) in the Jourdain et al. (2020) paper. But we are applying the method to bathymetry data. We have added additional information to the manuscript to make this clear.

Figure 1. This is a nice figure. I’d suggest to restrict the top left inset to the FRIS region/continental shelf otherwise it’s a bit small to read.

Thanks for the good suggestion. We will consider this when revising the figure. In case we are transforming the figure to a conceptual one, we will probably delete the inlay entirely.

P5 L129 VILMA solves the global sea-level equation self-consistently,  
Thanks for the comment. We have adapted the phrasing.

L136 same question as above, for sea level drop (LGM scen.) I understand the negative offset to bathymetry. For regional/local SLR this should be a positive offset right?

We apply:  $\Delta(\text{RSL}) = -\Delta(\text{topography})$ . So when the RSL increases, the bedrock is deepened, while for a decreased RSL, the bedrock has been uplifted accordingly. The  $\Delta(\text{RSL})$  signal is a combination of different mechanisms (possibly with different signs), e.g. a far-field sea level rise (by melted ice) and a local sea level drop by bedrock uplift. In the LGM case, the far-field signal is a drop in sea level, while locally RSL increases where bedrock subsidence dominates.

L145 again, difficulties to understand this, you start the flood fill algorithm in the open ocean, i.e. beyond the continental shelf break and then work your way forward towards the same or lower bathymetry? In this case you would never reach the continental shelf. I seem to misunderstand something here, but maybe consider to rephrase this. For me “lower bathymetry” means deeper ocean bed.

The flood-fill algorithm is repeated for each vertical level, starting at bottom and subsequently “filling up” the topography that can be reached from the open ocean. This is done in vertical steps of 1m. Please see also the appendix to Author Comment 1 from Nicola et al. (in review, <https://doi.org/10.5194/egusphere-2023-2583-AC1>) where we give a more detailed explanation

of how the algorithm works. We are sorry that our explanation in the manuscript seems to create confusion. We will rework this and provide a more detailed explanation in the revised manuscript.

Section 2.4 If I understand correctly, you derive a 2D forcing field for PICO from averaging over the thermal forcing acquired over the continental shelf taking into account critical access depth of pathways instead of simply averaging over a continuous depth range? Maybe state this more explicitly somewhere.

Not exactly. The “default” forcing for PICO is acquired by averaging the Schmidtko et al. (2014) data over the region of the continental shelf. In Reese et al. (2023) these basin average temperatures are tuned together with the two PICO parameters C and gamma. We take their adjusted Schmidtko temperatures as baseline forcing.

Then we compute anomalies at the continental-shelf break for different RSL configurations and apply these anomalies as a modification to the baseline forcing.

We apologize if the manuscript does not communicate this clearly enough. We will try to improve this in the revised manuscript.

L190 suggest to rephrase this. E.g. : this agrees well with e.g. Clark et al, 2009 suggesting an Antarctic delay of 4.5 – 12 kyr with respect to the global LGM sea level lowstand.

Thanks for this good suggestion. We have adapted the manuscript accordingly.

L197 does that mean you integrate PISM for 86 kyrs at 4 km resolution (in L181 you mention 4km resolution in your initialisation)? That would be very impressive indeed.

This is somewhat misleading in combination with l.180. The coupled PISM-VILMA simulations have been performed with 16km resolution, but the diagnostic PICO simulations with altered bed topography on 4km resolution. We have added a small paragraph to Sect. 2.5 to clarify this and avoid misunderstandings.

L200 “plausible RSL change rates as observed by GNSS measurements” I suggest to show this in supplementary materials.

We understand the interest in this comparison. We are currently describing those coupled PISM-VILMA experiments and data comparisons in a separate publication.

“Then, from present-day onwards” assume this means 2005?

The historical period is from 1850 to 2015. We have added this information to the manuscript.

L205 “which can potentially increase Antarctic ice loss dramatically but is poorly constrained ...”

Thanks for the suggestion. We have added the proposed phrasing.

L206 “To also include ...”

Thanks. Done.

L206.. “To include also non-Antarctic cryospheric changes and reflect redistributions in the global water budget, we add a uniform GMSL contribution of 3.68 m on ” is this contribution added in a timeseries or all at once? While being a secondary effect later on it would affect your results at least somewhat if you already add this during the 21st and 22ndcenturies.

We first compute the RSL change by the coupled PISM-VILMA simulation, where PISM is forced by the ISMIP6 2300 extension forcing. The coupled PISM-VILMA simulation is unaware of any cryospheric changes that are not covered by the Antarctic Ice Sheet instance of PISM. and all at once.

L215-220 I find your methodological approach very intriguing, however I am missing a caveat paragraph mentioning that ocean circulation amongst other things would change in light of these large scenario differences which might actually make the critical access depth a secondary effect (or vice versa enhance it even).

Thanks for the comment. In the current version of the manuscript, we discuss that the maximum order of magnitude of RSL induced basal-melt changes is comparable to other processes (like changes in external ocean forcing). We agree that this can still mean that the RSL effect is dominated by other processes. We will extend the discussion accordingly.

Also, maybe I missed this in the introduction or methods, but how do you force your LGM15k scenario? ESM-time slice, parameterized, ...? What ocean conditions do you provide as baseline before correcting for bathymetry changes?

The coupled ice-solid Earth simulations for deriving the LGM15k RSL configuration are forced by an ice load history (ICE-6G\_C) for the northern hemisphere and climate forcing and initialisation for the Antarctic Ice Sheet as described in Albrecht et al. (2020a): both surface air temperature forcing as well as ocean forcing (PICO default input) is scaled by ice core data (EPICA Dome C and WAIS Divide core). From these coupled ice-solid Earth simulations, we take the RSL change to correct the ocean bathymetry in our further analysis.

Concerning the baseline ocean forcing that we use before correcting for bathymetry changes: The “default” forcing for PICO is acquired by averaging the Schmidtko et al. (2014) data over the region of the continental shelf. In Reese et al. (2023) these basin average temperatures are tuned together with the two PICO parameters C and  $\gamma_r^*$ . We take their adjusted Schmidtko temperatures as baseline forcing for our study.

It is important to note that we only changed the bed topography (and accordingly the ocean conditions at critical access depth), but the climate boundary conditions remained the same in all ice-sheet experiments when calculating the basal melt rate changes, in order to get an estimate on the RSL effect alone.

Figure 2 b) I do not understand this figure, if you'd remove all ice you'd get a ca.  $1/3 \cdot H$  (ice thickness) bedrock rebound due to the missing ice load. That would put most of East Antarctica far above sea level. How is sea level defined in this case? East Antarctica would mostly be above sea level? This comes back to my general comment about rather meaningless impact on basal melt rates where you neither have ice nor contact with the ocean. Or do you always consider a present-day ice sheet configuration and compute the offset in thermal forcing due to difference access depths which are caused by LGM or future changes in ice load/RSL? What

does “adjusted grounding line” mean in this case? Comment: this all becomes clear later on in the manuscript but I’d recommend clarifying this much earlier.

Relative sea level change is defined relative to present or in terms of bed topography, relative to present-day observations. The  $\frac{1}{3}H$  estimate is not far off the realized bed uplift (RSL drop) in the coupled model. The geoid basically defines the ocean surface, such that RSL change can be meaningfully defined also in regions above the actual sea level (geoid).

In our experiments, however, only the RSL changes are considered for present-day ice thickness. Of course, this is not at all consistent, but it provides an upper theoretical estimate of its potential influence. This study is a sensitivity study and just focuses on one aspect.

The adjustment of the grounding line to the changed bed elevation but same ice thickness is only a relatively small correction and has only little influence on the results.

Thanks for letting us know that the structure of the manuscript can be improved. We will try to explain the methodology more consistently from the beginning onwards to avoid confusion.

Figure 2: Wouldn’t it make more sense to compute the change in thermal forcing for the actual ice sheet configuration used to compute the RSL changes?

Thanks for the comment. Indeed, this would be a useful comparison, but it is not straightforward.

The transient PISM-VILMA simulations are based on external ocean forcing (LGM15k), where 2D Schmidtke data is scaled with ice core reconstructions to represent climatic variations (see comment above). In the yr2300 case, the ISMIP6 extension forcing is applied as a spatially 2D time-evolving anomaly. Both methods are not suitable to calculate CSB anomalies, as the data has no 3D spatial resolution. It is at least questionable whether it is appropriate to compute CSB anomalies from the (present-day) Jourdain et al (2020) dataset, and add it as an additional anomaly to the scaled climate forcing used in the ice-GIA climate forcing parameterisation.

We will explore whether we can add a comparison with/without the impact of RSL also for non present-day ice-sheet states and will propose a discussion of this point in the revised manuscript.

Figure 2: Generally, the figure is quite hard to read due to the small subplots.

Thanks for pointing this out. We have changed the figure from one column to two column format, which makes it much bigger.

L239 amount

We have changed the phrasing to “..., which can be more than 400 m locally.”

L271 potential access of ocean currents to the grounding line?

We have adapted the phrasing to “As the concept of critical access depth relates to the potential access of off-shore water masses to the grounding line, an estimated shift of critical access depths for given changes in relative sea level is not trivial.”

L286 “For comparability we use a grounding line position corresponding to the present-day ice thickness for all scenarios, which has been horizontally adjusted to obtain the floatation criterion for applied bedrock changes ” I suggest to mention this definition already in the method section. Thanks for the good suggestion. We will adapt the manuscript accordingly.

L289-291 again, while it is interesting to see what such a shift would mean for basal melting it is still a bit hypothetical as the grounding line would be far advanced for the LGM-state and thus most of the area you are discussing here would be covered by grounded ice. If I understand correctly (and maybe I don't) you compute basal melt rates for a present-day ice sheet configuration (albeit with a horizontally adjusted grl, see comment above) given an offset in the critical access depth due to a completely different scenario of ice cover.

It is true that the applied RSL configuration is derived from different ice-sheet states than the present-day configuration that we use to compute changes in melt rates. While not ideal, we think it is appropriate to do a first order estimation of the maximum effect of RSL on basal melt rates. We do the horizontal grounding line adjustment in order to still have a physically consistent ice sheet state, as the bedrock is modified but not the ice thickness. However, this has little influence on the results.

Figure 4+5 what's the second black line (not the continental shelf), ice shelf front?

Yes, the black line encompasses the continental shelf area. As we exclude the ice shelf areas, the line towards the ice sheet represents the ice shelf front.

L326-332 this is a nice summary and could be well positioned in the introduction already.

This is a good idea, thanks for the suggestion. We will move it to the introduction in the revised manuscript.

L333 what do you mean by “the implied potential change of present-day temperatures”? temperature change due to change in critical access depth or applied lgm anomaly?

We are referring to the computed anomalies based on changes in critical access depth using the RSL change in the LGM case. We will rephrase this to avoid confusion in the revised manuscript.

Figure 6. This is a nice figure but also contains a ton of information, I had to look at it for quiet some time to understand what's going on. Maybe the caption could be a little more explicit and expanded to guide the reader through.

Thanks for the comment. We will extend the figure caption to give the reader more guidance.

L345 “The icefree scenario shows a maximum difference of  $\pm 0.5^{\circ}\text{C}$  in continental-shelf break temperatures” again I presume this relates to delta T due to changes of access depths?

Exactly. We will rephrase this to be more explicit.

L398 Colleoni et al. (2018) discuss how oceanic heat supply to AIS margins (shelf edge?) can operate ...

Thanks for the comment. We changed “AIS margins” to “Antarctic grounding lines” in the

manuscript.

L401 do you mean exchange between different shelves or do you mean “along-shelf transport”  
With “cross-shelf exchange” we were referring to water mass transport and transformation from the continental-shelf break (or further offshore) onto the continental shelf towards the grounding lines. We have adapted the phrasing accordingly to be more specific.

L392-404 this discussion/clarification/caveats should occur already in the intro/motivation. E.g. while reading the manuscript it wasn't clear to me that you employ a present day ocean to compute the basal melt rate changes due to scenario dependent changes in bathymetry. Thanks for the comment. We agree that the overall scope and idea of the paper can be better understood, if we already give an outlook about the applied methods and underlying assumptions in the introduction. We will rework the introduction to include this.

L409 Why do you not assume this? Please elaborate. One might wonder if considerable higher grl depths don't change the outcome why would changes in critical access depth at coarser resolution matter? A short explanation would be nice here.

As the deepest grounding line percentages typically correlate with fast flowing ice stream regions, we assume that the melting there is of greater importance than in shallower areas, which are covered by higher grounding line percentages ( $g > 50\%$ ). As we only see small differences for the deeper grounding line parts with respect to the flood-fill resolution, we assume that the overall findings of the study is independent of resolution. We will provide more information about this in the manuscript.

L438 topographic structure

Thanks for spotting this error. We have corrected it.

L439-441 very true (see my general comments). I am missing the reason why to include such a scenario as it wouldn't mean anything for an actual ice sheet (or better to say absent ice sheet). As we have outlined above, the idea of an icefree RSL configuration is to derive an upper bound for RSL induced basal melt changes. We will rephrase the overall storyline of the paper to be more clear about the sensitivity character of our study.

L443 we adjust the grounding line position (I don't follow the choice of bold face font in the discussion).

Our intention was to give the reader a better overview about the aspects of different paragraphs in the discussion without introducing additional structures like subsections. We can either explain this in the beginning of the section or refrain from using boldface for keywords.

L446 here I don't know why you correct for the RSL effect on floatation while ignoring the fact that the critical access depths are due to completely different extreme ice sheet geometries. The idea of correcting the grounding line position to the applied RSL configuration is to avoid artifacts that can lead to unrealistic results. For example: if the applied RSL change is high at the present-day grounding line (e.g. +100m bedrock uplift), then the critical access depths

would be 100m shallower (in the absence of any oceanic gateways that can yield the access of open water), when using the same grounding line position as before. However when the bedrock is uplifted, the grounding line would advance on a prograde slope to maintain a physically consistent floatation criterion (even in the absence of any changes in the ice thickness). By the advancement of the grounding line, the depth of the grounding line would be less than the 100m uplift applied initially, which also has an effect on the critical access depths. We agree that it seems odd to apply a small scale correction for the grounding-line position, while using a present-day ice configuration for RSL change scenarios that are derived under different ice sheet states. We will reconsider whether this adjustment is necessary when preparing the revised manuscript.

L481 Maybe also cite Hellmer et al 2012 here who where I think amongst the first to point out this possibility.

Good idea. Thanks for pointing this out.

L493 “We compare our estimates to similar effects induced by shifts in climatic boundary conditions, associated with altered wind patterns, sea ice and ocean dynamics.” Where is this comparison except for noting it in the discussion?

We only mention it in the discussion. As this was also noted in RC1, we have removed this sentence from the conclusion.

L495 the relevance

Corrected. Thanks.
